# Supplementary material
Source: PubMed Central journal article supplement (PMC6893290)
Supplement: EMBR-20-e48170-s001.pdf [file EMBR-20-e48170-s001.pdf]

## Table of Contents

|                   |   |
|-------------------|---|
| Appendix Fig S1   | 2 |
| Appendix Fig S2   | 3 |
| Appendix Fig S3   | 4 |
| Appendix Table S1 | 5 |

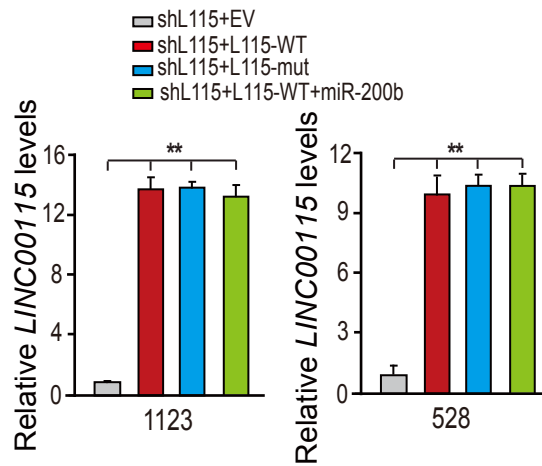

**Appendix Fig S1** qRT-PCR analysis of shRNA-resistant LINC00115 wild type or mutant with or without miR-200b overexpression in 1123/shL115 and 528/shL115 GSCs. Data are representative of three independent experiments. Error bars,  $\pm$  SD. \*\*,  $p < 0.01$ , by One-way ANOVA.

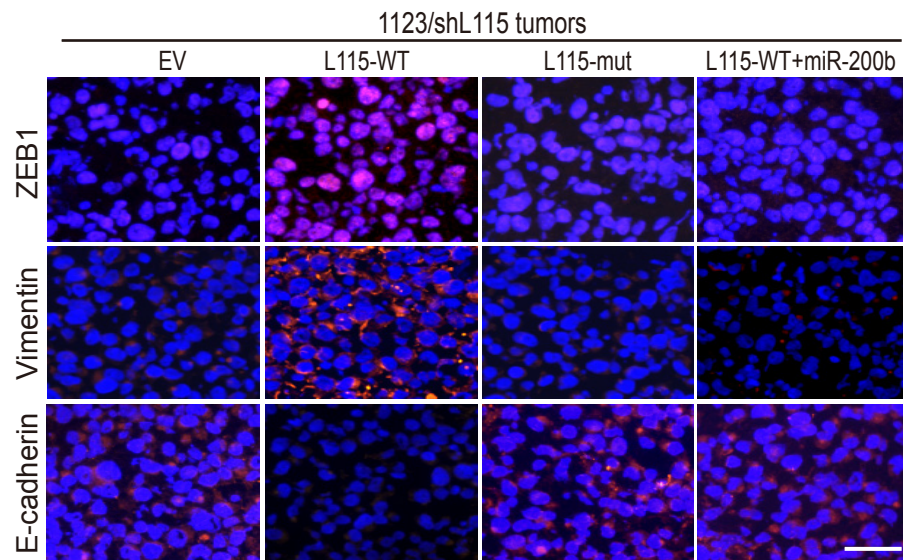

**Appendix Fig S2** Corresponding to Figures 4G. Immunofluorescence (IF) analysis of protein expression of ZEB1, vimentin, and E-cadherin in tumors from Figures 4G. Images are representative of two independent experiments. Scale bars: 50  $\mu$ m.

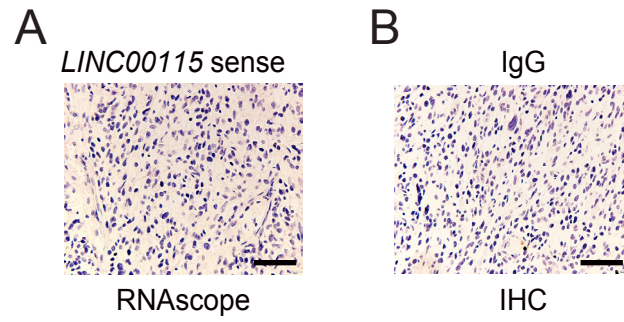

**Appendix Fig S3** Representative images of a RNAscope control with *LINC00115* sense and a IHC control with IgG in a paraffin-embedded clinical GBM samples. Images are representative of two independent experiments. Scale bar, 50  $\mu$ m.

**Appendix Table S1** Primers for DNA constructs and qRT-PCR

|                           |                                                                                                                               |
|---------------------------|-------------------------------------------------------------------------------------------------------------------------------|
| lentiCRIPSR-ZNF596-1      | F: CACCGGTCTACAATGATATCCTCGA<br>R: AAACCTCGAGGATATCATTGTAGACC                                                                 |
| lentiCRIPSRv2GFP-ZNF596-2 | F: CACCGACCGGATTCCATGACCTTCG<br>R: AAACCGAAGGTCATGGAATCCGGTC                                                                  |
| pCDNA3- ZNF596            | F: CAGTGTGCTGGAATTCATGCCATCA<br>CCGGATTCCATGAC<br>R: CTAGATGCATGCTCGAGTTACATAT<br>TCATTGCTTTTTTAG                             |
| pLVX-ZNF596 primers:      | F: CCGGACTCAGATCTCGAGATGCCA<br>TCACCGGATTCCATGAC<br>R: CCGTCGACTGCAGAATTCTTACATAT<br>TCATTGCTTTTTTAG                          |
| ZNF596 shRNA #1           | F: TGGACACATCCCAGAGAAAGCTCGAAAGCTTTC<br>TCTGGGATGTGTCTTTTC<br>R: TCGAGAAAAGGACACATCCCAGAGAAAGCTTTC<br>GAGCTTTCTCTGGGATGTGTCCA |
| ZNF596 shRNA #2           | F: TGGCAAACAGCTCTGCAAATCACGAATGATTTG<br>CAGAGCTGTTTGCTTTTC<br>R: TCGAGAAAAGGCAAACAGCTCTGCAAATCATTC<br>GTGATTTGCAGAGCTGTTTGCCA |
| pCDNA3- LINC00115         | F: GACTGAGTCGCCCGGATCCGACCCGGAAACGG<br>ATTATC<br>R: GTCGAGGCCTGCAGGAATTCTATCTTTGAGCAAT<br>TTAT                                |
| pLVX- LINC00115           | F: CCGGACTCAGATCTCGAGACCCGGAAACGGAT<br>TATC<br>R: CCGTCGACTGCAGAATTCTATCTTTGAGCAATTTA<br>T                                    |
| LINC00115 shRNA #1        | F: TGCATGTGGCTTGTCTTCCATCCGAAGATGGA<br>AGACAAGCCACATGCTTTTC<br>R: TCGAGAAAAGCATGTGGCTTGTCTTCCATCTTCG<br>GATGGAAGACAAGCCACATGC |
| LINC00115 shRNA #2        | F: TACCCTCGTGCTTCTGCACAATCGAAATTGTGCA<br>GAAGCACGAGGGTTTTTC<br>R: TCGAGAAAACCCTCGTGCTTCTGCACAATTTCTGA<br>TTGTGCAGAAGCACGAGGGT |

|                                   |                                                                                                                                                                                                                                            |
|-----------------------------------|--------------------------------------------------------------------------------------------------------------------------------------------------------------------------------------------------------------------------------------------|
| pCDNA3-LINC00115-mut(200b/c)      | 191 to 213bp<br>F: GAGTTTGTTTAATATTCAACAGCTTC<br>CTCTATTCCTTTGTATG<br>R: GTTGAATATTAACAAACTCAAATCAT<br>CAATATCCTTACGGAGTG<br>648 to 665bp<br>F: GGGCTTCTTAATTGACTCGCTGTGG<br>ATGTCGAGGTGGG<br>R: CCACAGCGAGTCAATTAAGAAGCCC<br>CTGCCAAGGAGG |
| pCDNA3-LINC00115-mut<br>(sh115-2) | F: ACCCTCGTACTTCTACACAATCGCCTCC<br>CACTAGCGGTG<br>R: GCGATTGTGTAGAAGTACGAGGGTT<br>GTTACAGGATCGGGC                                                                                                                                          |
| pCDNA3.3-Flag-MS2                 | F: AGAGAATTCGGATCCGGAATTGATCCGC<br>GGCCGCGCATG<br>R: CTTCCATGGCTCGAGGGTGGTGATG<br>ATGGTTAATTAAGG                                                                                                                                           |
| pLVX-Flag-MS2                     | F: CCGGACTCAGATCTCGAGCCAGCCTCCGGACT<br>GAGCTCC<br>R: GTAGAATTATCTAGAGGTGGTGATGAGGTTAAT<br>TAAGG                                                                                                                                            |
| pcDNA3-LINC00115-MS-12X           | F: ATAAATTCGTCAAAGGGATCCTAAGGTACCTAA<br>TTG<br>R: CTCTAGATGCATGCTCGAGGATCTAATGAACC<br>CGGGA                                                                                                                                                |
| <i>LINC00115</i> qRT-PCR          | F: AGCGGTGACTGTTGGGTG<br>R: CATCCACAGCGAGGCAAT                                                                                                                                                                                             |
| <i>ZEB1</i> qRT-PCR               | F: GGCATACACCTACTCAACTACGG<br>R: TGGGCGGTGTAGAATCAGAGTC                                                                                                                                                                                    |
| <i>ZNF596</i> qRT-PCR             | F: ACCGGATTCCATGACCTTCG<br>R: CTCTGGGATGTGTCCAGCAG                                                                                                                                                                                         |
| <i>EZH2</i> qRT-PCR               | F: AATCAGAGTACATGCGACTGAGA<br>R: GCTGTATCCTTCGCTGTTTCC                                                                                                                                                                                     |
| <i>ACTB</i> qRT-PCR               | F: CATGTACGTTGCTATCCAGGC<br>R: CTCCTTAATGTCACGCACGAT                                                                                                                                                                                       |

|                |                                                                                                                                                                                                                                                                                                                                                                                                      |
|----------------|------------------------------------------------------------------------------------------------------------------------------------------------------------------------------------------------------------------------------------------------------------------------------------------------------------------------------------------------------------------------------------------------------|
| ChIP-qPCR,EZH2 | <p>-1934 to -1725bp<br/>F: CAGCTCATCGGGAGGCTGAG<br/>R: AGGTCACCTATGAACTGTTG</p> <p>-1425 to -1201bp<br/>F: GGGTTCACGCCATTCTCCTG<br/>R: GCAAAGTGTGAGGATATTTG</p> <p>-896 to -751bp<br/>F: GACCAAGACCCGTCTCTACT<br/>R: TGGTTGTCCAGGCTGGAGT</p> <p>-630 to -421bp<br/>F: GAGCCGACCTCCGGGGCCCG<br/>R: GGC GGGACGAAGCGCCGGC</p> <p>-235 to -5bp<br/>F: GGCGTCCCTTACAGCGAAC<br/>R: GCGCCAAACGCGGCAGCCC</p> |
|----------------|------------------------------------------------------------------------------------------------------------------------------------------------------------------------------------------------------------------------------------------------------------------------------------------------------------------------------------------------------------------------------------------------------|
