# Supplementary material
Source: PubMed Central journal article supplement (PMC6893290)
Supplement: EMBR-20-e48170-s002.pdf [file EMBR-20-e48170-s002.pdf]

## Expanded View Figures

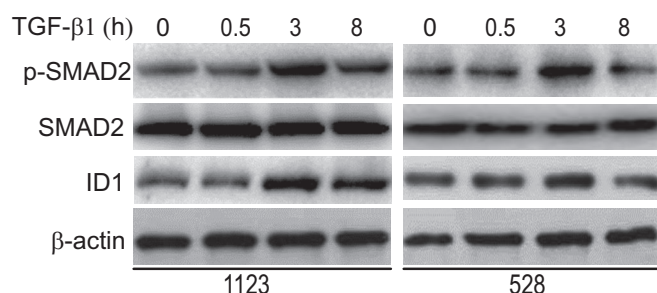

**Figure EV1. TGF- $\beta$  activated SMAD2 phosphorylation and ID1 expression in GSCs.**

Western blotting of TGF- $\beta$ -activated SMAD2 phosphorylation and ID1 expression in GSCs. 1123 and 528 GSCs were pre-cultured for 16 h in DMEM/F12 medium with EGF (2 ng/ml) and bFGF (2 ng/ml) and then followed by co-culturing with or without 20- $\mu$ g/ml TGF- $\beta$ 1 for the indicated times. Data are representative of three independent experiments.

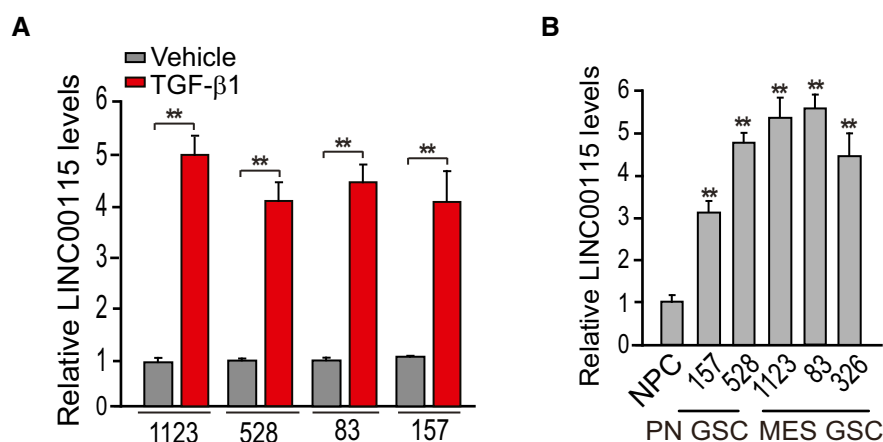

**Figure EV2. qRT-PCR analysis of LINC00115 expression in GSCs.**

A qRT-PCR analysis of LINC00115 expression in 1123, 528, 83, and 157 GSCs stimulated with or without TGF- $\beta$  for 3 h.

B qRT-PCR analysis of LINC00115 expression in NPCs, PN, and MES GSCs.

Data information: In (A and B), data are representative of three independent experiments. Error bars,  $\pm$  SD. \*\* $P < 0.01$ , by two-tailed t-test.

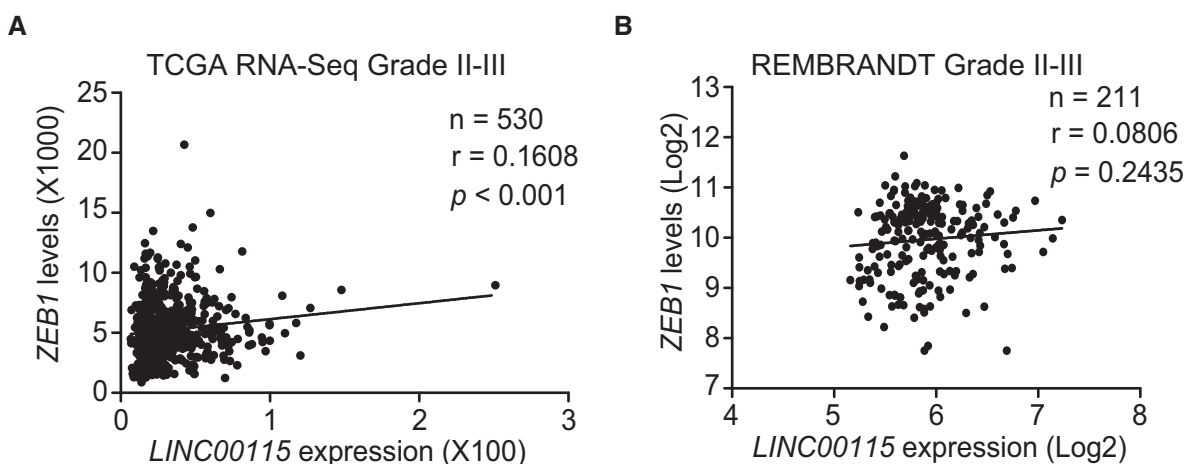

**Figure EV3. Correlation of expression between LINC00115 and ZEB1 in grade II-III glioma specimens.**

Corresponding to Fig. 4A and B. Correlation of expression between LINC00115 and ZEB1 in grade II-III glioma specimens from TCGA RNA-Seq (A) and REMBRANDT array dataset (B). Statistical analysis was performed by two-tailed t-test.

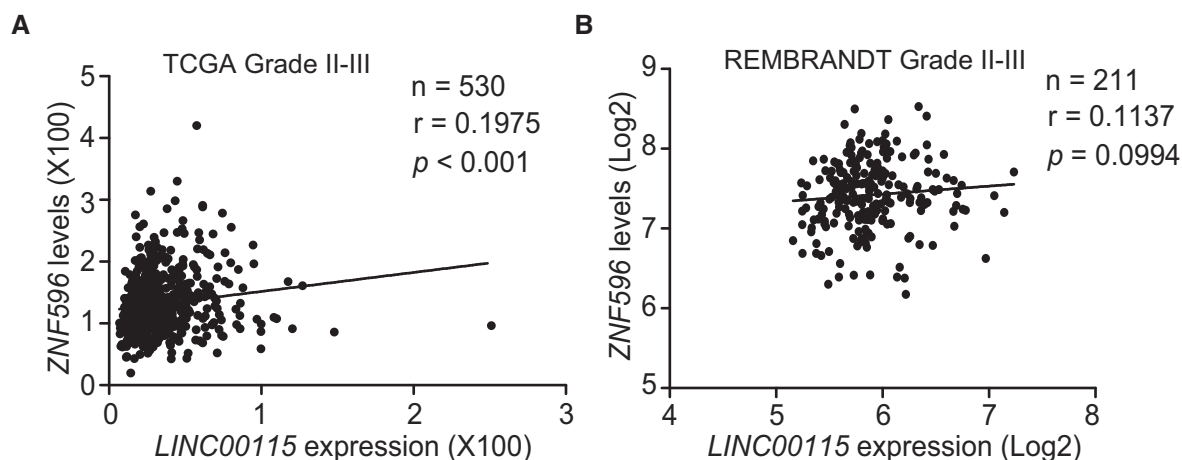

**Figure EV4. Correlation of expression between *LINC00115* and *ZNF596* in grade II-III glioma specimens.**

Corresponding to Fig 5J and K. Correlation of expression between *LINC00115* and *ZNF596* in grade II-III glioma specimens from TCGA RNA-Seq (A) and REMBRANDT array dataset (B). Statistical analysis was performed by two-tailed t-test.

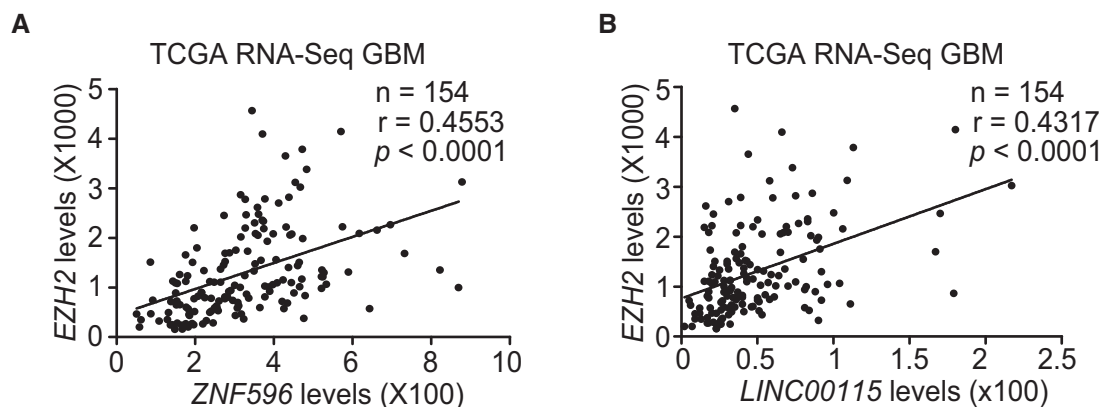

**Figure EV5. Correlation of expression between *EZH2* and *ZNF596* or *LINC00115* in GBM specimens.**

Correlation of expression between *EZH2* and *ZNF596* (A) or *LINC00115* (B) in GBM specimens from TCGA RNA-Seq dataset. Statistical analysis was performed by two-tailed t-test.
